# Supplementary material for: Uncovering differential gene expression between mtRNA-positive and -negative osteosarcoma cells: implications beyond mitochondrial function
Source: Front Genet. 2025 Sep 17;16:1588581. doi: 10.3389/fgene.2025.1588581 (PMC12483910; doi:10.3389/fgene.2025.1588581)
Supplement: Supplementary file 3 [file Table1.xlsx]

## Sheet: Sheet1
ID	adj.P.Val	P.Value	t	B	logFC	Gene.symbol	Gene.title
ILMN_1760412	0.00103	5.81e-08	52.4251	6.01344	2.40238	SHISA2	shisa family member 2
ILMN_1701308	0.00103	7.41e-08	49.8946	5.9722	3.76582	COL1A1	collagen type I alpha 1 chain
ILMN_2389069	0.00103	8.74e-08	48.2557	5.94232	3.89251	PAEP	progestagen associated endometrial protein
ILMN_1768176	0.00151	1.6e-07	42.6503	5.81627	2.66925	PBDC1	polysaccharide biosynthesis domain containing 1
ILMN_1685608	0.00236	3.49e-07	36.4007	5.61343	4.08304	NPTX2	neuronal pentraxin 2
ILMN_1670926	0.00236	3.53e-07	36.3178	5.61014	2.96531	CHST15	carbohydrate (N-acetylgalactosamine 4-sulfate 6-O) sulfotransferase 15
ILMN_1667295	0.00236	4e-07	35.4094	5.57278	1.07886	VASN	vasorin
ILMN_1802646	0.00296	5.8e-07	32.8314	5.45269	2.00394	EPHB6	EPH receptor B6
ILMN_1774330	0.00571	1.53e-06	-26.9311	5.07162	-1.08128	WSCD1	WSC domain containing 1
ILMN_1748004	0.00571	1.57e-06	26.7964	5.06065	3.23779	PAEP	progestagen associated endometrial protein
ILMN_1746658	0.00603	2.1e-06	25.2561	4.92593	1.17143	RORB	RAR related orphan receptor B
ILMN_1741021	0.00603	2.15e-06	25.1229	4.91343	1.30718	CH25H	cholesterol 25-hydroxylase
ILMN_1728478	0.00603	2.16e-06	25.1211	4.91326	1.53553	CXCL16	C-X-C motif chemokine ligand 16
ILMN_1718734	0.00603	2.24e-06	-24.921	4.8942	-1.79952	MLLT6	MLLT6, PHD finger domain containing
ILMN_1746013	0.00603	2.3e-06	24.7896	4.88151	3.39564	SPOCK1	sparc/osteonectin, cwcv and kazal-like domains proteoglycan (testican) 1
ILMN_2341343	0.00663	2.81e-06	23.7986	4.78092	2.20348	AGTR1	angiotensin II receptor type 1
ILMN_1766675	0.00716	3.44e-06	22.832	4.67388	2.95601	CDH6	cadherin 6
ILMN_1698179	0.00716	3.49e-06	22.7655	4.66618	2.73963	TAGLN3	transgelin 3
ILMN_2390853	0.00749	3.81e-06	22.3629	4.61847	1.34495	CTSH	cathepsin H
ILMN_1805561	0.0085	4.74e-06	21.384	4.49483	2.99763	SLC14A1	solute carrier family 14 member 1 (Kidd blood group)
ILMN_1671392	0.0085	5.6e-06	20.6651	4.39654	1.7399	KCNF1	potassium voltage-gated channel modifier subfamily F member 1
ILMN_1689088	0.0085	5.77e-06	20.5392	4.37863	3.1834	COLEC12	collectin subfamily member 12
ILMN_2091310	0.0085	5.88e-06	20.4607	4.36735	2.14457	ANO1	anoctamin 1
ILMN_1731374	0.0085	5.92e-06	20.4291	4.3628	1.44383	CPE	carboxypeptidase E
ILMN_2132982	0.00883	6.78e-06	19.8667	4.2792	4.3117	IGFBP5	insulin like growth factor binding protein 5
ILMN_1758128	0.00883	7.07e-06	19.6967	4.25303	1.47798	CYGB	cytoglobin
ILMN_1776188	0.00883	7.23e-06	19.6074	4.2391	1.99995	MAP1LC3A	microtubule associated protein 1 light chain 3 alpha
ILMN_1711702	0.00883	7.29e-06	-19.5744	4.23392	-1.97959	CLEC2D	C-type lectin domain family 2 member D
ILMN_1656837	0.00962	8.38e-06	19.0238	4.14504	2.18781	RBP1	retinol binding protein 1
ILMN_1761425	0.00962	8.55e-06	18.9442	4.13179	1.13495	OLFML2A	olfactomedin like 2A
ILMN_1711439	0.00971	8.84e-06	18.8167	4.11033	1.12288	EMILIN1	elastin microfibril interfacer 1
ILMN_2205896	0.01009	9.52e-06	18.5337	4.06174	1.60961	MEIS3P1	Meis homeobox 3 pseudogene 1
ILMN_1734542	0.01009	9.62e-06	-18.4941	4.05482	-1.47718	OVGP1	oviductal glycoprotein 1
ILMN_1794492	0.01106	1.09e-05	-18.0181	3.96958	-1.4562	HOXC6	homeobox C6
ILMN_2342554	0.01176	1.19e-05	17.6866	3.90775	1.05676	TAGLN3	transgelin 3
ILMN_1652246	0.01288	1.34e-05	17.2837	3.82971	1.06459	NACAD	NAC alpha domain containing
ILMN_1802411	0.01779	2e-05	15.9133	3.53845	1.30456	ITGA1	integrin subunit alpha 1
ILMN_2192072	0.01796	2.05e-05	15.8204	3.51712	1.4124	MMP7	matrix metallopeptidase 7
ILMN_1803213	0.01848	2.19e-05	15.61	3.46806	1.91181	MXRA5	matrix remodeling associated 5
ILMN_1667374	0.01856	2.31e-05	15.4378	3.42709	1.02386	L3HYPDH	trans-L-3-hydroxyproline dehydratase
ILMN_1698243	0.01856	2.34e-05	15.4039	3.41892	1.16357	GLMP	glycosylated lysosomal membrane protein
ILMN_1652826	0.01856	2.36e-05	15.3754	3.41204	2.15903	LRRC17	leucine rich repeat containing 17
ILMN_1795442	0.01922	2.48e-05	15.2121	3.3722	2.15547	LAMA4	laminin subunit alpha 4
ILMN_1788874	0.02056	2.8e-05	14.8371	3.27795	1.82847	SERPINA3	serpin family A member 3
ILMN_1657332	0.02056	2.81e-05	-14.8332	3.27696	-1.16693	CCDC85B	coiled-coil domain containing 85B
ILMN_1807016	0.02056	2.83e-05	14.8069	3.2702	1.24471	LHX2	LIM homeobox 2
ILMN_1671703	0.02167	3.1e-05	14.5312	3.19817	2.59593	ACTA2	actin, alpha 2, smooth muscle, aorta
ILMN_2124802	0.02228	3.3e-05	14.3409	3.14715	1.18942	MT1H	metallothionein 1H
ILMN_1759330	0.02341	3.58e-05	14.1028	3.08178	1.48883	KIF1A	kinesin family member 1A
ILMN_2352090	0.02341	3.6e-05	14.0842	3.07661	2.39069	GPRC5C	G protein-coupled receptor class C group 5 member C
ILMN_1668863	0.02341	3.66e-05	14.0397	3.06416	1.56736	LYPD1	LY6/PLAUR domain containing 1
ILMN_1725772	0.02379	3.93e-05	13.8343	3.00593	1.09016	POU3F2	POU class 3 homeobox 2
ILMN_3248676	0.02434	4.23e-05	13.6264	2.94561	1.11268	CBWD3	COBW domain containing 3
ILMN_3247023	0.02491	4.38e-05	13.5269	2.91624	1.12057	CASC15	cancer susceptibility candidate 15 (non-protein coding)
ILMN_2140059	0.025	4.45e-05	13.4832	2.90323	2.03801	LAMA4	laminin subunit alpha 4
ILMN_1814327	0.02561	4.71e-05	13.3202	2.85412	2.10793	AGTR1	angiotensin II receptor type 1
ILMN_1751963	0.02574	4.84e-05	-13.2492	2.83245	-1.32279	ZCWPW1	zinc finger CW-type and PWWP domain containing 1
ILMN_1685403	0.02798	5.72e-05	12.7973	2.69028	1.04828	MMP7	matrix metallopeptidase 7
ILMN_1806349	0.02798	5.77e-05	12.7738	2.68266	1.02112	SLC6A8	solute carrier family 6 member 8
ILMN_1656920	0.02798	5.81e-05	12.7558	2.67685	3.38308	CRIP1	cysteine rich protein 1
ILMN_1666776	0.02845	6.02e-05	12.6587	2.64515	1.30447	KCNQ2	potassium voltage-gated channel subfamily Q member 2
ILMN_1738742	0.02861	6.14e-05	12.61	2.62912	2.17879	PLAT	plasminogen activator, tissue type
ILMN_1815057	0.02861	6.26e-05	12.5585	2.61208	2.37006	PDGFRB	platelet derived growth factor receptor beta
ILMN_1812312	0.02861	6.3e-05	12.5404	2.60606	1.08808	NDUFS4	NADH:ubiquinone oxidoreductase subunit S4
ILMN_2157099	0.02924	6.62e-05	12.4105	2.56249	1.4864	CCNA1	cyclin A1
ILMN_1761858	0.0294	6.82e-05	12.3366	2.5374	1.05143	MID1	midline 1
ILMN_1771652	0.0294	6.85e-05	12.3245	2.53328	1.79364	BAIAP2L2	BAI1 associated protein 2 like 2
ILMN_2071809	0.03065	7.2e-05	12.1952	2.48882	2.39028	MGP	matrix Gla protein
ILMN_1733811	0.0313	7.63e-05	12.0491	2.43773	1.24229	JUP	junction plakoglobin
ILMN_1811767	0.0313	7.66e-05	-12.0398	2.43444	-1.90608	INHBE	inhibin beta E subunit
ILMN_1730986	0.0313	7.69e-05	12.0297	2.43087	1.19229	MALT1	MALT1 paracaspase
ILMN_1794863	0.0313	7.75e-05	12.0091	2.42361	2.29389	CAMK2N1	calcium/calmodulin dependent protein kinase II inhibitor 1
ILMN_1651343	0.03296	8.3e-05	11.8382	2.36242	1.30703	ITGA11	integrin subunit alpha 11
ILMN_1778611	0.03524	9.1e-05	11.6136	2.28006	1.21964	GBAS	glioblastoma amplified sequence
ILMN_1689274	0.03876	0.000108	-11.1975	2.12149	-1.64271	NIPA1	non imprinted in Prader-Willi/Angelman syndrome 1
ILMN_1704446	0.03876	0.00011	11.1626	2.10782	1.84446	SLC6A10P	solute carrier family 6 member 10, pseudogene
ILMN_1718766	0.03898	0.000111	11.1319	2.09576	2.98084	MT1F	metallothionein 1F
ILMN_2120555	0.03996	0.000117	11.0228	2.05246	1.45891	ADCY1	adenylate cyclase 1
ILMN_1726928	0.04004	0.000119	-10.9854	2.03747	-2.81325	TCEA3	transcription elongation factor A3
ILMN_1796316	0.04013	0.000121	10.9396	2.01905	2.91397	MMP9	matrix metallopeptidase 9
ILMN_1802106	0.04429	0.000143	10.5584	1.86155	1.60349	APOBEC3G	apolipoprotein B mRNA editing enzyme catalytic subunit 3G
ILMN_1702301	0.04429	0.000147	-10.5011	1.83721	-1.35968	DOCK10	dedicator of cytokinesis 10
ILMN_1740512	0.04429	0.000147	10.4951	1.83465	2.11706	TMSB15B	thymosin beta 15B
ILMN_1679391	0.04713	0.000163	10.2735	1.73883	1.24321	MAMDC2	MAM domain containing 2
ILMN_1791002	0.04713	0.00017	10.1889	1.70151	1.09782	SKP2	S-phase kinase-associated protein 2, E3 ubiquitin protein ligase
ILMN_1729117	0.04713	0.000173	10.1513	1.68479	2.77147	COL5A2	collagen type V alpha 2 chain
ILMN_1726138	0.04713	0.000173	10.1472	1.68297	1.05122	EI24	EI24, autophagy associated transmembrane protein
ILMN_2150352	0.04713	0.000174	10.1395	1.67954	1.92136	CBWD5	COBW domain containing 5
ILMN_1796734	0.04816	0.00018	10.0592	1.64354	2.46725	SPARC	secreted protein acidic and cysteine rich
ILMN_1706505	0.04936	0.000188	9.96922	1.60276	2.6158	COL5A1	collagen type V alpha 1 chain
ILMN_1703178	0.04982	0.000195	9.89558	1.56903	1.05872	SCG2	secretogranin II
